# Supplementary material
Source: publisher site journal article supplement (https://www.spandidos-publications.com/4444/downloadSupplementary)
Supplement: Supplementary file 1 [file downloadSupplementary]

## Sheet: WGCNA.darkgrey
Table SX. 1156 hub genes associated with clinical features of small-cell lung cancer by Weighted gene co-expression network analysis
76P
AADAT
AASS
AATF
ABCA5
ABCD1
ABHD2
ACAA2
ACAD8
ACADVL
ACBD7
ACE2
ACOT1
ACSM3
ACTB
ACTL6B
ACVR2B
ADAM20
ADAM23
ADAM7
ADAMTSL2
ADARB2
ADCK1
ADCY3
ADD2
ADSL
AES
AFF1
AFF3
AFG3L2
AFMID
AGPAT3
AGPAT5
AGR2
AGR3
AGTPBP1
AGXT
AIFM2
AK1
AKAP12
AKR1B1
AKR1C3
AKR1C4
ALDH1B1
ALDH9A1
ALDOC
ALG12
ALLC
ALPK1
AMBN
AMELX
AMELY
AMFR
AMOTL1
AMPD2
AMPH
AMT
ANGPTL3
ANK1
ANKIB1
ANKK1
ANKRD13C
ANKRD31
ANKRD43
ANKRD54
ANKS6
ANLN
ANXA11
ANXA2
ANXA2P1
ANXA2P2
ANXA6
AP3B1
APBA1
APBA2
APLP1
APOA1
APOO
ARFRP1
ARHGAP11A
ARHGEF10
ARHGEF18
ARL11
ARL13A
ARL15
ARL6IP4
ARL6IP6
ARMC7
ARMC8
ARNT2
ARNTL2
ARPP-19
ARS2
ARSD
ASB13
ASCC3L1
ASNS
ASTN1
ASXL2
ASXL3
ATAD2
ATAD5
ATCAY
ATF3
ATF7
ATG4D
ATG7
ATP13A1
ATP2A3
ATP5O
ATP6AP2
ATP6V0A2
ATP6V0E1
ATP9B
ATXN10
ATXN2L
ATXN3L
AURKA
AURKB
AUTS2
AXUD1
AYTL2
AZI1
B3GALT2
B4GALNT1
B4GALNT3
B4GALT2
B4GALT4
B4GALT6
BAAT
BACE1
BAIAP2L1
BAZ1B
BCAM
BCAR1
BCL7A
BCL7B
BCL9
BRAP
BRCA1
BRCA2
BRD4
BRF2
BRIP1
BRUNOL4
BRUNOL5
BTBD3
BTN2A2
BTN3A2
BTNL9
BUB1
BUB1B
C10orf12
C10orf76
C11orf80
C12orf26
C12orf34
C12orf38
C12orf53
C13orf23
C13orf26
C14orf100
C14orf101
C14orf106
C14orf121
C14orf159
C14orf166B
C14orf174
C14orf24
C14orf37
C14orf43
C14orf72
C14orf78
C14orf80
C15orf26
C15orf41
C15orf42
C16orf14
C16orf3
C16orf30
C16orf55
C16orf75
C17orf53
C17orf56
C17orf59
C17orf63
C17orf69
C18orf17
C18orf24
C18orf25
C18orf34
C18orf37
C18orf54
C18orf55
C18orf8
C19orf23
C19orf48
C19orf52
C19orf7
C1GALT1
C1orf101
C1orf103
C1orf107
C1orf109
C1orf121
C1orf125
C1orf129
C1orf135
C1orf141
C1orf146
C1orf164
C1orf176
C1orf178
C1orf189
C1orf190
C1orf198
C1orf201
C1orf32
C1orf41
C1orf50
C1orf53
C1orf55
C1orf61
C1orf94
C1orf96
C1QDC1
C1QTNF5
C20orf11
C20orf112
C20orf119
C20orf12
C20orf197
C20orf24
C20orf26
C20orf30
C20orf56
C20orf77
C21orf45
C21orf6
C21orf88
C22orf30
C2orf32
C2orf48
C4orf19
C4orf34
C5orf23
C6orf146
C6orf201
C6orf26
C7orf25
C7orf49
C8orf45
C8orf47
C9orf106
C9orf11
C9orf138
C9orf150
C9orf3
C9orf30
C9orf32
C9orf40
C9orf66
C9orf84
CABLES2
CABYR
CACNA1C
CACNG4
CADM3
CAMP
CAPNS1
CAPNS2
CASC1
CASC5
CASK
CASP14
CASP2
CASP7
CASP8
CASQ2
CAST
CAT
CBL
CBX2
CBX3
CBY1
CC2D1A
CCDC11
CCDC123
CCDC129
CCDC135
CCDC14
CCDC17
CCDC34
CCDC35
CCDC5
CCDC65
CCDC77
CCDC82
CCDC93
CCL26
CCNA1
CCNA2
CCNB2
CCRL1
CD200
CD47
CDC25A
CDC25B
CDC27
CDC45L
CDC7
CDCA2
CDCA3
CDCA5
CDCA7
CDCA7L
CDH19
CDH24
CDH3
CDH7
CDIPT
CDK5R1
CDK5RAP1
CDK5RAP2
CDK5RAP3
CDKL4
CDKN1C
CDR2
CDRT1
CDRT4
CDS2
CDT1
CEACAM6
CEACAM8
CEBPG
CELSR2
CENPA
CENPE
CENPJ
CENPO
CENTD2
CENTG3
CEP152
CEP170
CEP55
CEP72
CEP76
CEP78
CER1
CES3
CETN1
CFLAR
CGI-09
CHAC1
CHAF1A
CHCHD4
CHD5
CHD9
CHEK1
CHKB
CHMP1B
CHMP4B
CHMP7
CHN1
CHORDC1
CHPF
CHRM1
CHST12
CHST5
CHST6
CIAPIN1
CIB2
CIDEC
CIP29
CITED4
CKAP2
CKAP2L
CKB
CKS1B
CKS2
CLDN12
CLDN20
CLGN
CLK2P
CLN5
CLPB
CLPS
CLRN3
CLSPN
CMYA5
CNGA4
CNIH2
CNN1
CNOT3
ETV1
EVC2
EVI1
EXO1
EXOC4
EZH2
FAIM
FAM104A
FAM10A4
FAM118A
FAM123B
FAM125B
FAM126A
FAM12A
FAM130A1
FAM131B
FAM18B2
FAM19A1
FAM19A4
FAM33A
FAM35A
FAM46B
FAM48A
FAM54A
FAM55A
FAM58A
FAM64A
FAM73B
FAM7A2
FAM83B
FAM83H
FAM84B
FAM86D
FANCC
FARP2
FASTKD5
FAT2
FBXL18
FBXO27
FBXO3
FBXO31
FBXO32
FBXO43
FBXO7
FBXW10
FBXW4
FEM1C
FES
FGD4
FGF12
FGF5
FHIT
FHL1
FHOD3
FJX1
FLJ10120
FLJ10213
FLJ11286
FLJ11506
FLJ12529
FLJ12684
FLJ12886
FLJ12949
FLJ13195
FLJ20105
FLJ20273
FLJ20294
FLJ20366
FLJ20699
FLJ23834
FLJ25778
FLJ25996
FLJ30428
FLJ32549
FLJ33790
FLJ34047
FLJ34048
FLJ35220
FLJ36031
FLJ36874
FLJ37440
FLJ38377
FLJ39639
FLJ39660
FLJ39779
FLJ40869
FLJ41766
FLJ41841
FLJ42986
FLJ44606
FLJ45422
FLJ45530
FLJ45910
FLJ46010
FLJ46109
FLRT3
FMO6P
FNDC7
FOS
FOSB
FOXA2
FOXK1
FOXM1
FOXR1
FREM2
FRMD5
FRMPD4
FRRS1
FRY
FSD1
FSD1L
FTHL11
FUK
FUS
FUT4
FXYD6
FYCO1
G6PC3
GAB2
GABPB2
GABRB1
GABRR2
GAD2
GALC
GALNT12
GALNT13
GALNT3
GARS
GATAD1
GATM
GC
GCDH
GCK
GCNT1
GEM
GEMIN7
GFPT1
GFRA2
GFRAL
GGH
GINS1
GIPC3
GJA1
GLDN
GLRA3
GLT1D1
GLUD2
GLYCAM1
GMPS
GNAI1
GNAZ
GNG2
GNG3
GOLPH2
GOLPH3
GOLPH3L
GPIAP1
GPM6B
GPR1
GPR160
GPR161
GPR175
GPR77
GPR85
GRIK1
GRIN2C
GRIPAP1
GRK7
GSDMDC1
GSG2
GSK3A
GSTA1
GSTO1
GSTP1
GTF3C1
GTF3C4
GTPBP1
GTPBP3
GTPBP5
H-plk
H1FX
H2AFV
HAT1
HCFC1
hCG_1659830
hCG_1660138
hCG_1776047
hCG_1783907
hCG_1795560
hCG_1815491
hCG_1815504
hCG_20114
hCG_2028557
hCG_2033311
hCG_401283
HCG4
HCP5
HDAC11
HDAC3
HDAC7A
HDGF
HDGFRP3
HDHD2
HDHD3
HEATR2
HELLS
HERC2
HERV-FRD
HEXDC
HHLA2
HIATL1
HIG2
HIPK2
HIPK3
HIST1H1B
HIST1H2AH
HIST1H2BA
HIST1H2BE
HIST1H2BJ
HIST1H2BK
HIST1H3C
HIST1H3D
HIST1H4D
HIST1H4E
HIST2H2AB
HIST3H2A
HIVEP2
HLA-A
HLA-A29.1
HLA-E
HLA-G
HLA-H
HLCS
HMG2L1
HMG4L
HMGCL
HMSD
HNMT
HNRPA2B1
HNRPD
HNRPM
HNRPUL2
HNT
HOXA10
HOXA11
HOXA11S
HOXA2
HOXA3
HOXA7
HOXA9
HOXD3
HP
HPS4
HRASLS2
HRBL
HS322B1A
HSD17B13
HSD17B4
HSMPP8
HSPA14
2021-03-06
NT5DC3
NTN4
NUDCD1
NUDT15
NUDT19
NUDT9P1
NUMB
NUP153
NUP188
NUP205
NUSAP1
NXPH1
OAZ1
OAZ3
ODF2
ODZ1
ODZ3
OIP5
OLFM1
ONECUT2
OPCML
OPRM1
OR10P1
OR10V1
OR13C3
OR2J2
OR2J3
OR4A15
OR4K1
OR4K15
OR4K2
OR4N2
OR51A7
OR51B6
OR51E2
OR51F2
OR51L1
OR51T1
OR52B4
OR52I2
OR52N4
OR5AP2
OR5AU1
OR5AY1
OR5F1
OR5H15
OR5U1
OR5V1
OR6C2
OR6K6
OR7E91P
OR8H1
OR9A2
OR9A4
ORC1L
ORC6L
OTOP3
OXTR
P2RY12
P2RY5
P53AIP1
PACSIN1
PAK6
PAK7
PAMCI
PANK1
PARD3B
PARD6G
PARP2
PARVA
PASK
PAX6
PAXIP1
PBEF1
PBK
PBX4
PBXIP1
PC-3
PCBP4
PCDH15
PCDHGA8
PCDHGB4
PCDHGB5
PCDHGB8P
PCGF6
PCNXL3
PCSK5
PCSK6
PCTP
PCYOX1L
PDCD10
PDCD5
PDCL
PDDC1
PDE10A
PDE1B
PDE2A
PDE6A
PDE7B
PDE8A
PDGFD
PDHX
PDIA6
PDP2
PDZD2
PDZD4
PELI1
PERLD1
PERQ1
PFDN5
PFKL
PHEX
PHF11
PHF13
PHF15
PHF16
PHGDH
PHKG1
PHKG2
PHLPP
PHPT1
PIAS1
PIAS4
PICK1
PIGT
PIGZ
PIK3R5
PILRB
PIM1
PIPOX
PITPNM1
PIWIL1
PJA2
PKHD1
PKHD1L1
PKIB
PKN1
PKP2
PLAGL2
PLAUR
PLCG1
PLCXD2
PLEKHG3
PLK1
PLLP
PLXNA2
PLXNC1
PMAIP1
PMM1
PMP2
PMS2L3
PNRC1
POFUT2
POLA2
POLD1
POLD2
POLDIP3
POLG
PON1
POP4
POPDC2
POU3F4
POU6F1
POU6F2
PPA1
PPAPDC3
PPARA
PPARD
PPFIA2
PPIL2
PPOX
PPP1R16A
PPP1R9B
PPP2R2B
PPP2R3A
PPP3R1
PPP3R2
PPWD1
PQLC1
PRC1
PRDM11
PRDM4
PRDX3
PRG4
PRKACA
PRKACB
PRKAR2A
PRKAR2B
PRKCE
PRKCZ
PRNP
PRO2266
PROX2
PRPF19
PRPF8
PRR11
PRR15
PRR6
PRR8
PRRC1
PRSS16
PRSS27
PRUNE2
PSCD2
PSG8
PSMA5
PSMC3IP
PSME1
PSME2
PTCD2
PTPDC1
PTPN2
PTPRN
PTPRN2
PTPRO
PTPRZ1
PTRF
PURB
PUS1
PUS7
PUS7L
PWWP2
PXN
QRICH2
RAB11A
RAB11B
RAB11FIP5
RAB12
RAB15
RAB19B
RAB32
RAB39B
RAB3C
RAB5B
RAB6B
RAB6IP1
RAB7L1
RAD51
RAD51AP1
RAD9A
RAE1
RALA
RALY
RAPGEF4
RARG
RARS2
RASGEF1A
RASIP1
RASSF7
RAVER1
RBBP8
RBKS
RBM3
RBM33
RBM5
RBM9
RBMS1
RBP1
RBP4
RBP7
RBPMS
RBX1
RCE1
REM2
RENBP
REXO1
RFC4
RFK
RFTN1
RFX1
RGS10
RGS17
RGS21
RGS22
RGS9BP
RHCE
RHEB
RHEBL1
RHOBTB2
RHOQ
RHOV
RIC8B
RICS
RIN1
RIOK1
RIOK3
RIT2
RKHD1
RNASE13
RNASEH2A
RNF122
RNF185
RNF8
2021-09-03
2021-09-09
SH3GL1
SH3PX3
SH3PXD2A
SH3PXD2B
SHD
SHFM1
SHOC2
SLAIN1
SLC13A1
SLC14A1
SLC18A1
SLC19A1
SLC1A2
SLC20A1
SLC22A18AS
SLC22A5
SLC23A2
SLC24A2
SLC24A4
SLC24A6
SLC25A17
SLC25A18
SLC25A21
SLC25A24
SLC25A27
SLC25A37
SLC25A40
SLC26A5
SLC27A2
SLC29A4
SLC2A10
SLC2A14
SLC2A3
SLC35D3
SLC35F5
SLC37A3
SLC4A10
SLC7A11
SLC7A13
SLC8A1
SLC9A2
SLC9A3R1
SLCO1C1
SLCO4A1
SLFN14
SLITRK3
SLITRK5
SLITRK6
SLK
SLMO2
SMAD1
SMAD2
SMAD7
SMARCA4
SMARCA5
SMC1A
SMC2
SMC5
SMC6
SMCHD1
SMCR7L
SMPD1
SMPD3
SMPD4
SMPDL3A
SMS
SMURF1
SMURF2
SNAP25
SNCB
SNN
SNORA14A
SNORA32
SNORA42
SNORA46
SNORA51
SNORA54
SNORA6
SNORA71C
SNORD102
SNORD42A
SNORD63
SNORD84
SSR1
UNQ6125
UPF1
UQCRC1
USP14
USP3
USP37
USP38
USP42
USP44
USP47
VAMP3
VAPA
VBP1
VGF
VN1R4
VPS13D
VTCN1
WDFY1
WDR26
WDR40C
WDR42A
WDR44
WDR64
WDR7
WDR76
WFDC6
WFDC9
WIBG
WNK2
WNK3
XKR6
XKR7
XKR9
XLKD1
XPC
XPNPEP3
XRCC2
XRCC6
XXbac-BCX216M5.7
XYLT2
YEATS2
YIPF6
YTHDF1
YWHAB
ZADH1
ZADH2
ZAR1
ZBTB1
ZBTB16
ZBTB2
ZBTB22
ZBTB34
ZBTB38
ZBTB4
ZBTB46
ZC3H14
ZC3H7B
ZCCHC12
ZCCHC9
ZCWPW1
ZFP161
ZFP30
ZFP36L1
ZFP41
ZFP57
ZHX2
ZIK1
ZMIZ2
ZMYM3
ZMYND19
ZMYND8
ZNF101
ZNF117
ZNF124
ZNF132
ZNF136
ZNF154
ZNF217
ZNF26
ZNF289
ZNF291
ZNF3
ZNF300
ZNF313
ZNF324
ZNF334
ZNF354C
ZNF367
ZNF384
ZNF397
ZNF417
ZNF43
ZNF431
ZNF439
ZNF488
ZNF506
ZNF507
ZNF508
ZNF516
ZNF532
ZNF534
ZNF574
ZNF587
ZNF588
ZNF609
ZNF620
ZNF641
ZNF675
ZNF680
ZNF700
ZNF710
ZNF711
ZNF716
ZNF724P
ZNF761
ZNF767
ZNF774
ZNF791
ZNF84
ZNF85
ZSCAN18
ZSWIM4
